# Supplementary material
Source: PubMed Central journal article supplement (PMC533054)
Supplement: 7600470s1.pdf [file 7600470s1.pdf]

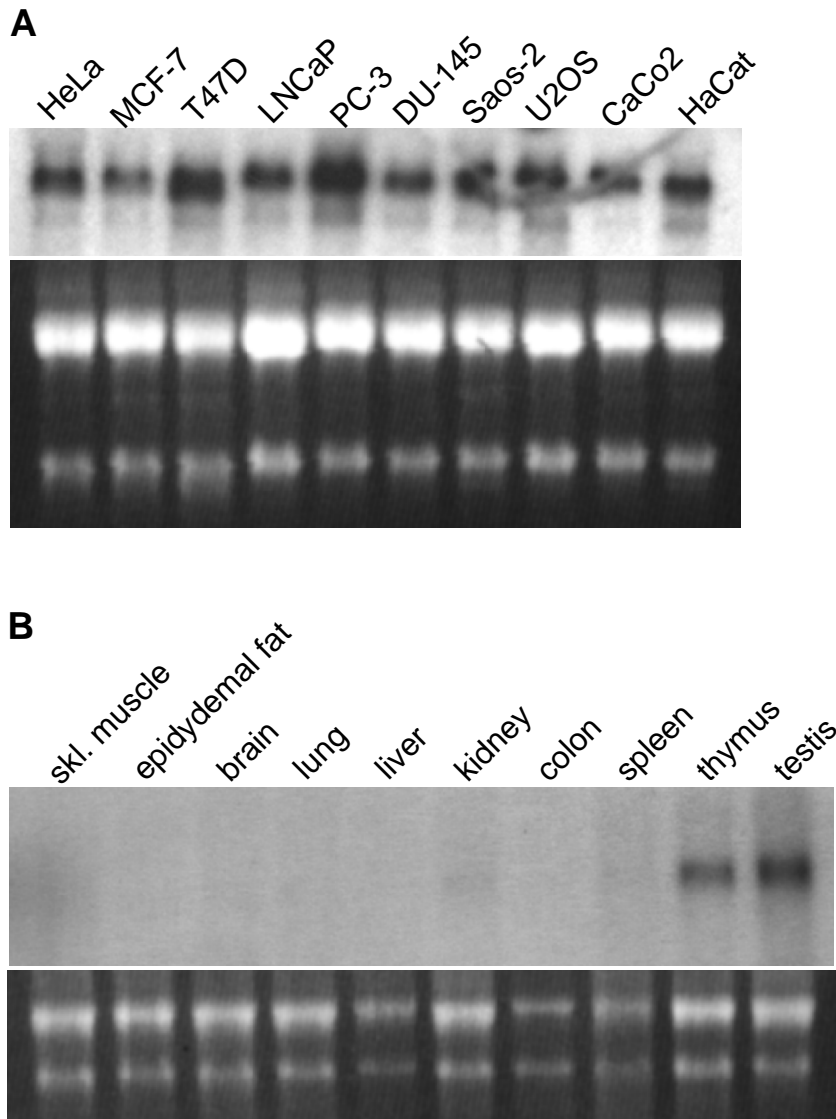

### Supplementary Figure S1

Expression of lin-9 in human tumor cell lines (A) and various mouse tissues (B) was analyzed by Northern-blot (upper panels). Lower panels: Ethidium bromide staining of the rRNA to verify equal loading.

hLin-9 mRNA was detected in all cell lines tested and there were no significant differences in hLin-9 expression levels in the cell lines investigated. In primary tissues the expression of mLin-9 was highest in thymus and testis. In all other tissues analyzed, low expression levels of mLin-9 were detected after prolonged exposure (not shown). Thus, mammalian hLin-9 is expressed in primary untransformed tissues as well as in transformed cell lines.
